# Supplementary material
Source: PubMed Central journal article supplement (PMC4718530)
Supplement: ac5b03238_si_003.pdf [file ac5b03238_si_003.pdf]

Supporting information for:

## Development, optimization, and evaluation of a duplex droplet digital PCR assay to quantify the *T-nos/hmg* copy number ratio in genetically modified maize

Félix-Urquídez Dalmira<sup>1,2</sup>, Pérez-Urquiza Melina<sup>2\*</sup>, León-Félix Josefina<sup>1\*</sup>, Valdez-Torres José Benigno<sup>1</sup>, García-Estrada Raymundo<sup>1</sup>, Acatzi-Silva Abraham<sup>3</sup>

<sup>1</sup>Center for Alimentation and Development Investigation, Culiacán, Sinaloa, México

<sup>2</sup>National Metrology Center, El Marqués, Querétaro, México

<sup>3</sup>Reference National Center for Detection of Genetically Modified Organisms, Tecámac, Estado de México, México

\*Corresponding authors:

[meperez@cenam.mx](mailto:meperez@cenam.mx)

[ljosefina@ciad.mx](mailto:ljosefina@ciad.mx)

### Table of contents

|                                                                                                                                                                                    |     |
|------------------------------------------------------------------------------------------------------------------------------------------------------------------------------------|-----|
| <b>Table S1.</b> Primers and probes sequences used in the <i>T-nos</i> and <i>hmg</i> amplification .....                                                                          | S2  |
| <b>Table S2.</b> Central composite design for optimization of a duplex ddPCR assay. DMR 447 IIa: NK603 100% mass fraction.....                                                     | S3  |
| <b>Table S3.</b> Central composite design for optimization of a duplex ddPCR assay. DMR 447 Va: NK603 10% mass fraction.....                                                       | S4  |
| <b>Table S4.</b> Linear regression models built for optimized response variables in a duplex ddPCR method for <i>T-nos/hmg</i> analysis. DMR 447 IIa (100% <i>T-nos/hmg</i> )..... | S5  |
| <b>Table S5.</b> Linear regression models built for optimized response variables in a duplex ddPCR method for <i>T-nos/hmg</i> analysis. DMR 447 Va: 10% <i>T-nos/hmg</i> .....    | S6  |
| <b>Table S6.</b> <i>T-nos</i> copy number, <i>T-nos/hmg</i> copy number ratio and relative standard deviation at different annealing temperatures.....                             | S7  |
| <b>Table S7.</b> Average values and variability for <i>hmg cp</i> at different <i>hmg</i> primer/probe concentrations.....                                                         | S7  |
| <b>Table S8.</b> Specificity test of a duplex ddPCR assay.....                                                                                                                     | S8  |
| <b>Table S9.</b> Applicability assay of the <i>T-nos/hmg</i> ddPCR method, on several corn varieties.....                                                                          | S9  |
| <b>Table S10.</b> Comparison of quantification using singleplex and duplex ddPCR assays.....                                                                                       | S9  |
| <b>Table S11.</b> DNA restriction enzyme digestion. DMR 447 Va (10% <i>T-nos/hmg</i> ) .....                                                                                       | S10 |
| <b>Figure S1.</b> Example of negative and positive results. ....                                                                                                                   | S10 |
| <b>Figure S2.</b> Overlaid contour plots for ddPCR optimization.....                                                                                                               | S11 |
| <b>Figure S3.</b> DNA enzymatic restriction digestion.....                                                                                                                         | S11 |
| <b>Annex S1.</b> DNA extraction protocol.....                                                                                                                                      | S12 |
| <b>Annex S2.</b> Enzymatic restriction digestion of genomic DNA.....                                                                                                               | S12 |
| <b>Annex S3.</b> Workflow for digital droplet PCR analysis.....                                                                                                                    | S12 |

**Table S1. Primers and probes sequences used in the *T-nos* and *hmg* amplification**

| <b>Name</b>        | <b>Sequence</b>                              | <b>Amplicon<br/>length</b> | <b>Reference</b>        |
|--------------------|----------------------------------------------|----------------------------|-------------------------|
| <b>Fw T-nos</b>    | 5'-CATGTAATGCATGACGTTATTTATG-3'              |                            |                         |
| <b>Rv T-nos</b>    | 5'-TTGTTTTCTATCGCGTATTAATGT-3'               |                            |                         |
| <b>T-nos probe</b> | 6FAM-ATGGGTTTTTATGATTAGAGTCCCGCAA-<br>MGBNFQ | 84 bp                      | Reiting et al.,<br>2007 |
| <b>Fw hmg</b>      | 5'-TTGGACTAGAAATCTCGTGCTGA-3'                |                            |                         |
| <b>Rv hmg</b>      | 5'-GCTACATAGGGAGCCTTGCCT-3'                  |                            |                         |
| <b>hmg probe</b>   | VIC-CAATCCACACAAACGCACGCGTA-MGBNFQ           | 79 bp                      | ISO<br>21570:2005       |

Fw =Forward, Rv = Reward

**Table S2. Central composite design for optimization of a duplex ddPCR assay. DMR 447 IIa: NK603 100% mass fraction**

| Order | Run | Pt | Block | Coded values |            |        | Natural values      |                    |            |
|-------|-----|----|-------|--------------|------------|--------|---------------------|--------------------|------------|
|       |     |    |       | <i>T-nos</i> | <i>Hmg</i> | Ta     | <i>Tnos</i><br>(nM) | <i>hmg</i><br>(nM) | Ta<br>(°C) |
| 10    | 1   | -1 | 1     | 1.682        | 0.000      | 0.000  | 1002 /<br>384       | 60 /<br>110        | 60         |
| 18    | 2   | 0  | 1     | 0.000        | 0.000      | 0.000  | 750 /<br>300        | 60 /<br>110        | 60         |
| 6     | 3   | 1  | 1     | 1.000        | -1.000     | 1.000  | 900 /<br>350        | 40 /<br>80         | 61         |
| 20    | 4   | 0  | 1     | 0.000        | 0.000      | 0.000  | 750 /<br>300        | 60 /<br>110        | 60         |
| 13    | 5   | -1 | 1     | 0.000        | 0.000      | -1.682 | 750 /<br>300        | 60 /<br>110        | 58         |
| 4     | 6   | 1  | 1     | 1.000        | 1.000      | -1.000 | 900 /<br>350        | 80 /<br>140        | 59         |
| 9     | 7   | -1 | 1     | -1.682       | 0.000      | 0.000  | 498 /<br>216        | 60 /<br>110        | 60         |
| 7     | 8   | 1  | 1     | -1.000       | 1.000      | 1.000  | 600 /<br>250        | 80 /<br>140        | 61         |
| 8     | 9   | 1  | 1     | 1.000        | 1.000      | 1.000  | 900 /<br>350        | 80 /<br>140        | 61         |
| 14    | 10  | -1 | 1     | 0.000        | 0.000      | 1.682  | 750 /<br>300        | 60 /<br>110        | 62         |
| 3     | 11  | 1  | 1     | -1.000       | 1.000      | -1.000 | 600 /<br>250        | 80 /<br>140        | 59         |
| 17    | 12  | 0  | 1     | 0.000        | 0.000      | 0.000  | 750 /<br>300        | 60 /<br>110        | 60         |
| 19    | 13  | 0  | 1     | 0.000        | 0.000      | 0.000  | 750 /<br>300        | 60 /<br>110        | 60         |
| 12    | 14  | -1 | 1     | 0.000        | 1.682      | 0.000  | 750 /<br>300        | 95/16<br>0         | 60         |
| 2     | 15  | 1  | 1     | 1.000        | -1.000     | -1.000 | 900 /<br>350        | 40 /<br>80         | 59         |
| 1     | 16  | 1  | 1     | -1.000       | -1.000     | -1.000 | 600 /<br>250        | 40 /<br>80         | 59         |
| 16    | 17  | 0  | 1     | 0.000        | 0.000      | 0.000  | 750 /<br>300        | 60 /<br>110        | 60         |
| 5     | 18  | 1  | 1     | -1.000       | -1.000     | 1.000  | 600 /<br>250        | 40 /<br>80         | 61         |
| 11    | 19  | -1 | 1     | 0.000        | -1.682     | 0.000  | 750 /<br>300        | 25 /<br>60         | 60         |
| 15    | 20  | 0  | 1     | 0.000        | 0.000      | 0.000  | 750 /<br>300        | 60 /<br>110        | 60         |

Pt: point type; *T-nos*: *T-nos* primer/probe concentration; *hmg*: *hmg* primer/probe concentration; Ta: annealing temperature. Alpha = 1.68

**Table S3. Central composite design for optimization of a duplex ddPCR assay. DMR 447 Va: NK603 10% mass fraction.**

| Order | Run | Pt | Block | Coded values |            |        | Natural values      |                    |         |
|-------|-----|----|-------|--------------|------------|--------|---------------------|--------------------|---------|
|       |     |    |       | <i>T-nos</i> | <i>Hmg</i> | Ta     | <i>Tnos</i><br>(nM) | <i>hmg</i><br>(nM) | Ta (°C) |
| 15    | 1   | 0  | 2     | 0.000        | 0.000      | 0.000  | 750 /<br>300        | 60 /<br>110        | 60      |
| 9     | 2   | -1 | 2     | -1.682       | 0.000      | 0.000  | 498 /<br>216        | 60 /<br>110        | 60      |
| 7     | 3   | 1  | 2     | -1.000       | 1.000      | 1.000  | 600 /<br>250        | 80 /<br>140        | 61      |
| 20    | 4   | 0  | 2     | 0.000        | 0.000      | 0.000  | 750 /<br>300        | 60 /<br>110        | 60      |
| 19    | 5   | 0  | 2     | 0.000        | 0.000      | 0.000  | 750 /<br>300        | 60 /<br>110        | 60      |
| 6     | 6   | 1  | 2     | 1.000        | -1.000     | 1.000  | 900 /<br>350        | 40 /<br>80         | 61      |
| 12    | 7   | -1 | 2     | 0.000        | 1.682      | 0.000  | 750 /<br>300        | 95/16<br>0         | 60      |
| 16    | 8   | 0  | 2     | 0.000        | 0.000      | 0.000  | 750 /<br>300        | 60 /<br>110        | 60      |
| 4     | 9   | 1  | 2     | 1.000        | 1.000      | -1.000 | 900 /<br>350        | 80 /<br>140        | 59      |
| 13    | 10  | -1 | 2     | 0.000        | 0.000      | -1.682 | 750 /<br>300        | 60 /<br>110        | 58      |
| 3     | 11  | 1  | 2     | -1.000       | 1.000      | -1.000 | 600 /<br>250        | 80 /<br>140        | 59      |
| 18    | 12  | 0  | 2     | 0.000        | 0.000      | 0.000  | 750 /<br>300        | 60 /<br>110        | 60      |
| 1     | 13  | 1  | 2     | -1.000       | -1.000     | -1.000 | 600 /<br>250        | 40 /<br>80         | 59      |
| 8     | 14  | 1  | 2     | 1.000        | 1.000      | 1.000  | 900 /<br>350        | 80 /<br>140        | 61      |
| 11    | 15  | -1 | 2     | 0.000        | -1.682     | 0.000  | 750 /<br>300        | 25 /<br>60         | 60      |
| 14    | 16  | -1 | 2     | 0.000        | 0.000      | 1.682  | 750 /<br>300        | 60 /<br>110        | 62      |
| 2     | 17  | 1  | 2     | 1.000        | -1.000     | -1.000 | 900 /<br>350        | 40 /<br>80         | 59      |
| 5     | 18  | 1  | 2     | -1.000       | -1.000     | 1.000  | 600 /<br>250        | 40 /<br>80         | 61      |
| 7     | 19  | 0  | 2     | 0.000        | 0.000      | 0.000  | 750 /<br>300        | 60 /<br>110        | 60      |
| 10    | 20  | -1 | 2     | 1.682        | 0.000      | 0.000  | 1002<br>/ 384       | 60 /<br>110        | 60      |

Pt: point type; *T-nos*: *T-nos* primer/probe concentration; *hmg*: *hmg* primer/probe concentration; Ta: annealing temperature. Alpha = 1.68

**Table S4.** Linear regression models built for optimized response variables in a duplex ddPCR method for *T-nos/hmg* analysis. DMR 447 IIa (100% *T-nos/hmg*).

| Response variable       | Coefficient | p value | Regression model                                                                 | Adjusted R <sup>2</sup> |
|-------------------------|-------------|---------|----------------------------------------------------------------------------------|-------------------------|
| <b><i>T-nos/hmg</i></b> |             |         |                                                                                  |                         |
| Constant                | 52.53       | 0.000   | <b><i>T-nos/hmg</i> = 52.53 – 30.99<i>Ta</i></b>                                 | 70.34 %                 |
| <i>Ta</i>               | -30.99      | 0.000   |                                                                                  |                         |
| Lack of fit             | -           | 0.828   |                                                                                  |                         |
| <b><i>hmg cp</i></b>    |             |         |                                                                                  |                         |
| Constant                | 21,100      | 0.000   | <b><i>cp hmg</i> = 21,100</b>                                                    | -                       |
| Lack of fit             | -           | 0.580   |                                                                                  |                         |
| <b><i>T-nos ΔF</i></b>  |             |         |                                                                                  |                         |
| Constant                | 3694.5      | 0.000   | <b><math>\Delta F T-nos = 3694.5 + 862.7T-nos - 2428.5Ta + 443.8TaxTa</math></b> | 90.69 %                 |
| <i>T-nos</i>            | 862.7       | 0.000   |                                                                                  |                         |
| <i>Ta</i>               | -2428.5     | 0.000   |                                                                                  |                         |
| <i>TaxTa</i>            | 443.8       | 0.028   |                                                                                  |                         |
| Lack of fit             | -           | 0.024   |                                                                                  |                         |
| <b><i>hmg ΔF</i></b>    |             |         |                                                                                  |                         |
| Constant                | 995.75      | 0.000   | <b><math>\Delta F hmg = 995.8 + 432.0hmg - 63.4Ta + 45.4hmgxhmg</math></b>       | 94.85 %                 |
| <i>hmg</i>              | 432.02      | 0.000   |                                                                                  |                         |
| <i>Ta</i>               | -63.43      | 0.015   |                                                                                  |                         |
| <i>hmgxhmg</i>          | 45.39       | 0.061   |                                                                                  |                         |
| Lack of fit             | -           | 0.981   |                                                                                  |                         |

***T-nos/hmg***: *T-nos/hmg* copy number ratio. ***hmg cp***: *hmg* copy number. ***T-nos ΔF***: Fluorescence difference between *T-nos* positive and *T-nos* negative droplets. ***hmg ΔF***: Fluorescence difference between *hmg* positive and *hmg* negative droplets. ***T-nos***: *T-nos* primer/probe concentration. ***hmg***: *hmg* primer/probe concentration. ***Ta***: annealing temperature. **ddPCR**: digital droplet polymerase chain reaction. **R<sup>2</sup>**: coefficient of determination. **DMR 447 IIa**: certified reference material for NK603 (100% mass fraction).

**Table S5.** Linear regression models built for optimized response variables in a duplex ddPCR method for *T-nos/hmg* analysis. DMR 447 Va: 10% *T-nos/hmg*

| Response variable       | Coefficient | p value | Regression model                                                                                                 | Adjusted R <sup>2</sup> |
|-------------------------|-------------|---------|------------------------------------------------------------------------------------------------------------------|-------------------------|
| <b><i>T-nos/hmg</i></b> |             |         |                                                                                                                  |                         |
| Constant                | 5.06        | 0.000   | <b><i>T-nos/hmg</i> = 5.06 + 0.76<i>T-nos</i> – 2.58<i>Ta</i></b>                                                | 71.71 %                 |
| <i>T-nos</i>            | 0.76        | 0.060   |                                                                                                                  |                         |
| <i>Ta</i>               | -2.58       | 0.000   |                                                                                                                  |                         |
| Lack of fit             | -           | 0.504   |                                                                                                                  |                         |
| <b><i>hmg cp</i></b>    |             |         |                                                                                                                  |                         |
| Constant                | 21968.3     | 0.000   | <b><i>cp hmg</i> = 21968.3 – 876.6<i>hmg</i></b>                                                                 | 13.02%                  |
| <i>hmg</i>              | -876.6      | 0.066   |                                                                                                                  |                         |
| Lack of fit             | -           | 0.872   |                                                                                                                  |                         |
| <b><i>T-nos ΔF</i></b>  |             |         |                                                                                                                  |                         |
| Constant                | 3483.77     | 0.000   | <b><math>\Delta F T-nos = 3483.8 + 805.9T-nos - 2546.5Ta + 394.6hmgxhmg - 759.6T-nosxTa + 512.2hmgxTa</math></b> | 93.43 %                 |
| <i>T-nos</i>            | 805.92      | 0.000   |                                                                                                                  |                         |
| <i>hmg</i>              | 29.41       | 0.864   |                                                                                                                  |                         |
| <i>Ta</i>               | -2546.45    | 0.000   |                                                                                                                  |                         |
| <i>hmgxhmg</i>          | 394.56      | 0.030   |                                                                                                                  |                         |
| <i>T-nosxTa</i>         | -759.63     | 0.004   |                                                                                                                  |                         |
| <i>hmgxTa</i>           | 512.23      | 0.036   |                                                                                                                  |                         |
| Lack of fit             | -           | 0.693   |                                                                                                                  |                         |
| <b><i>hmg ΔF</i></b>    |             |         |                                                                                                                  |                         |
| Constant                | 1086.5      | 0.000   | <b><math>\Delta F hmg = 1086.5 + 445.6hmg - 125.7Ta</math></b>                                                   | 95.16 %                 |
| <i>hmg</i>              | 445.6       | 0.000   |                                                                                                                  |                         |
| <i>Ta</i>               | -125.7      | 0.000   |                                                                                                                  |                         |
| Lack of fit             | -           | 0.234   |                                                                                                                  |                         |

***T-nos/hmg***: *T-nos/hmg* copy number ratio. ***hmg cp***: *hmg* copy number. ***T-nos ΔF***: Fluorescence difference between *T-nos* positive and *T-nos* negative droplets. ***hmg ΔF***: Fluorescence difference between *hmg* positive and *hmg* negative droplets. ***T-nos***: *T-nos* primer/probe concentration. ***hmg***: *hmg* primer/probe concentration. ***Ta***: annealing temperature. **ddPCR**: digital droplet polymerase chain reaction. **R<sup>2</sup>**: coefficient of determination. **DMR 447 Va**: certified reference material for NK603 (10% mass fraction).

**Table S6.** *T-nos* copy number, *T-nos/hmg* copy number ratio and relative standard deviation at different annealing temperatures.

| Annealing temperature | <i>T-nos</i> cp |        | <i>T-nos/hmg</i> copy number ratio |        | RSD for <i>T-nos/hmg</i> copy number ratio |        |
|-----------------------|-----------------|--------|------------------------------------|--------|--------------------------------------------|--------|
|                       | DMR IIa         | DMR Va | DMR IIa                            | DMR Va | DMR IIa                                    | DMR Va |
| 58°C                  | 17,207          | 1747   | 90.5 %                             | 8.0 %  | 0.1 %                                      | 0.2 %  |
| 59°C                  | 18,334          | 1715   | 87.9 %                             | 7.8 %  | 1.2 %                                      | 5.4 %  |
| 60°C                  | 10,579          | 1193   | 52.8 %                             | 5.2 %  | 40.6 %                                     | 37.7 % |
| 61°C                  | 3,802           | 506    | 20.1 %                             | 2.4 %  | 76.2 %                                     | 39.6 % |
| 62°C                  | 10              | 0      | 0.1 %                              | 0.0 %  | 0.1 %                                      | 0.0 %  |

Average values at every temperature level. DMR IIa: NK603 (100% mass fraction). DMR Va: (10% mass fraction). cp: copies. RSD: relative standard deviation.

**Table S7.** Average values and variability for *hmg* cp at different *hmg* primer/probe concentrations.

| <i>hmg</i> primer/probe concentration |               | <i>hmg</i> cp |            | RSD for <i>hmg</i> cp |            |
|---------------------------------------|---------------|---------------|------------|-----------------------|------------|
| Coded level                           | Natural level | DMR 447 IIa   | DMR 447 Va | DMR 447 IIa           | DMR 447 Va |
| -1.68                                 | 25/40 nM      | 18890         | 24,663     | 3%                    | 14%        |
| -1.0                                  | 40/80 nM      | 20934         | 22,627     | 10%                   | 15%        |
| 0                                     | 60/110 nM     | 21058         | 21,820     | 18%                   | 10%        |
| 1.0                                   | 80/140 nM     | 19074         | 21,393     | 4%                    | 4%         |
| 1.68                                  | 95/160 nM     | 21112         | 20,570     | 4%                    | 4%         |

Average values at every *hmg* primer/probe concentration level. Data obtained from optimization of a duplex ddPCR method for *T-nos/hmg* analysis. DMR 447 IIa: 100% mass fraction. DMR 447 Va: 10% mass fraction. cp: copies. RSD: relative standard deviation.

**Table S8. Specificity test of a duplex ddPCR assay**

| <i>Species</i> | <i>Material</i> | <i>Transformation event</i> | <i>Mass fraction</i> | <i>T-nos</i> | <i>hmg</i> |
|----------------|-----------------|-----------------------------|----------------------|--------------|------------|
| <b>Maize</b>   |                 |                             |                      |              |            |
| Popcorn        | *               | ---                         | ---                  | -            | +          |
| Red            | *               | ---                         | ---                  | -            | +          |
| Blue           | *               | ---                         | ---                  | -            | +          |
| White          | *               | ---                         | ---                  | -            | +          |
| Yellow         | DMR 436 Ia      | MON 810                     | No GM                | -            | +          |
|                | DMR 453 Ia      | MON 88017                   | No GM                | -            | +          |
|                | DMR 451 Ia      | MON 863                     | No GM                | -            | +          |
|                | DMR 482 Ia      | ---                         | No GM                | -            | +          |
|                | DMR 436 Vb      | MON 810                     | 10%                  | -            | +          |
|                | DMR 447 IIIa    | NK603                       | 1%                   | +            | +          |
|                | DMR 451 Va      | MON 863                     | 10%                  | +            | +          |
|                | DMR 452 IIa     | MON 89034                   | 100%                 | +            | +          |
|                | DMR 453 Va      | MON 88017                   | 10%                  | +            | +          |
| <b>Soybean</b> | DMR 495 IIa     | MON 04032-6                 | 100%                 | +            | -          |
|                | DMR 495 IIIa    | MON 04032-6                 | 1%                   | +            | -          |
| <b>Wheat</b>   | DMR 496 IIa     | DREB-1 <sup>a</sup>         | 100%                 | +            | -          |
|                | DMR 496 IIIa    | DREB-1 <sup>a</sup>         | 1%                   | +            | -          |
| <b>Rice</b>    | *               | ---                         | ---                  | -            | -          |

\* Materials acquired as seeds at local markets.

The sign showed in the *T-nos* result and *hmg* result columns, specifies if there was (+) or not (-) amplification of the corresponding target.



**Table S9. Applicability assay of the *T-nos/hmg* ddPCR method, on several corn varieties.**

| <i>Tested variety</i> | <i>Expected T-nos/hmg copy number ratio</i> | <i>Measured T-nos/hmg copy number ratio</i> | <i>Relative standard deviation</i> | <i>Accuracy</i> |
|-----------------------|---------------------------------------------|---------------------------------------------|------------------------------------|-----------------|
| <i>Popping corn</i>   | 0.91%                                       | 1.0%                                        | 5.0%                               | 111.43%         |
| <i>Blue corn</i>      | 0.85%                                       | 0.93%                                       | 3.5%                               | 108.72%         |
| <i>Red corn</i>       | 0.99%                                       | 1.13%                                       | 5.5%                               | 113.56%         |
| <i>White corn</i>     | 0.84%                                       | 0.90%                                       | 1.2 %                              | 108.08%         |

Average from three replicates. Tested samples were prepared as a mix of DNA extracted from non-GM corn and GM corn for every variety. The analyzed variety represented at least 97.5% of the final mix.

**Table S10. Comparison of quantification using singleplex and duplex ddPCR assays**

| <i>Material</i>            | <i>Measurand</i>   | <i>Duplex (Dx)</i> | <i>Singleplex (Sx)</i> | <i>% CV duplex</i> | <i>% CV singleplex</i> | <i>% Bias Dx/Sx</i> |
|----------------------------|--------------------|--------------------|------------------------|--------------------|------------------------|---------------------|
| Dilution from DMR 447 IIIa | <i>T-nos cp</i>    | 20                 | 18                     | 3.2                | 13.0                   | 6.6                 |
|                            | <i>hmg cp</i>      | 27819              | 28235                  | 0.8                | 2.0                    | -1.3                |
|                            | <i>T-nos/hmg %</i> | 0.070              | 0.062                  | 2.5                | 13.8                   | <b>6.5</b>          |
| DMR 447 IIIa               | <i>T-nos cp</i>    | 185                | 174                    | 5.9                | 7.8                    | 6.3                 |
|                            | <i>hmg cp</i>      | 20486              | 20872                  | 1.1                | 0.9                    | -1.8                |
|                            | <i>T-nos/hmg%</i>  | 0.90               | 0.84                   | 5.0                | 8.1                    | <b>8.2</b>          |
| DMR 447 Va                 | <i>T-nos cp</i>    | 1563               | 1675                   | 2.4                | 1.7                    | -6.7                |
|                            | <i>hmg cp</i>      | 20553              | 20630                  | 1.9                | 1.7                    | -0.4                |
|                            | <i>T-nos/hmg %</i> | 7.6                | 8.1                    | 2.7                | 0.3                    | <b>-6.3</b>         |
| DMR 452 IIa                | <i>T-nos cp</i>    | 17001              | 17572                  | 1.6                | 1.9                    | -3.2                |
|                            | <i>hmg cp</i>      | 32023              | 32122                  | 1.8                | 1.3                    | -0.3                |
|                            | <i>T-nos/hmg %</i> | 53.1               | 54.7                   | 1.8                | 1.2                    | <b>-2.9</b>         |
| DMR 447 IIa                | <i>T-nos cp</i>    | 14242              | 14069                  | 4.0                | 0.3                    | 1.2                 |
|                            | <i>hmg cp</i>      | 16040              | 15819                  | 4.5                | 1.6                    | 1.4                 |
|                            | <i>T-nos/hmg %</i> | 88.8               | 89.0                   | 2.0                | 1.9                    | <b>-0.2</b>         |

Average from three replicates. \*This material was prepared as a dilution from DMR 447 IIIa (1% mass fraction), so the final concentration was not the same for duplex and singleplex assay (0.074 and 0.07%, respectively). To address this issue, the bias was estimated taking into account the accuracy achieved in every case.

**Table S11. DNA restriction enzyme digestion. DMR 447 Va (10% *T-nos/hmg*)**

| <i>Measurand</i>   | <i>Non-digested DNA</i> | <i>BamHI digestion</i> | <i>EcoRI digestion</i> | <i>Multiple digestion</i> | <i>XhoI digestion</i> |
|--------------------|-------------------------|------------------------|------------------------|---------------------------|-----------------------|
| <i>T-nos</i> cp    | 1491                    | 1739                   | 1645                   | 1625                      | 1336                  |
| <i>hmg</i> cp      | 18895                   | 17844                  | 17398                  | 17815                     | 17552                 |
| <i>T-nos/hmg</i> % | 7.9 <sup>bc</sup>       | 9.8 <sup>a</sup>       | 9.5 <sup>ab</sup>      | 9.1 <sup>abc</sup>        | 7.6 <sup>c</sup>      |

Average from three replicates. Treatments not sharing a letter are significantly different. (Tukey method, P<0.05).

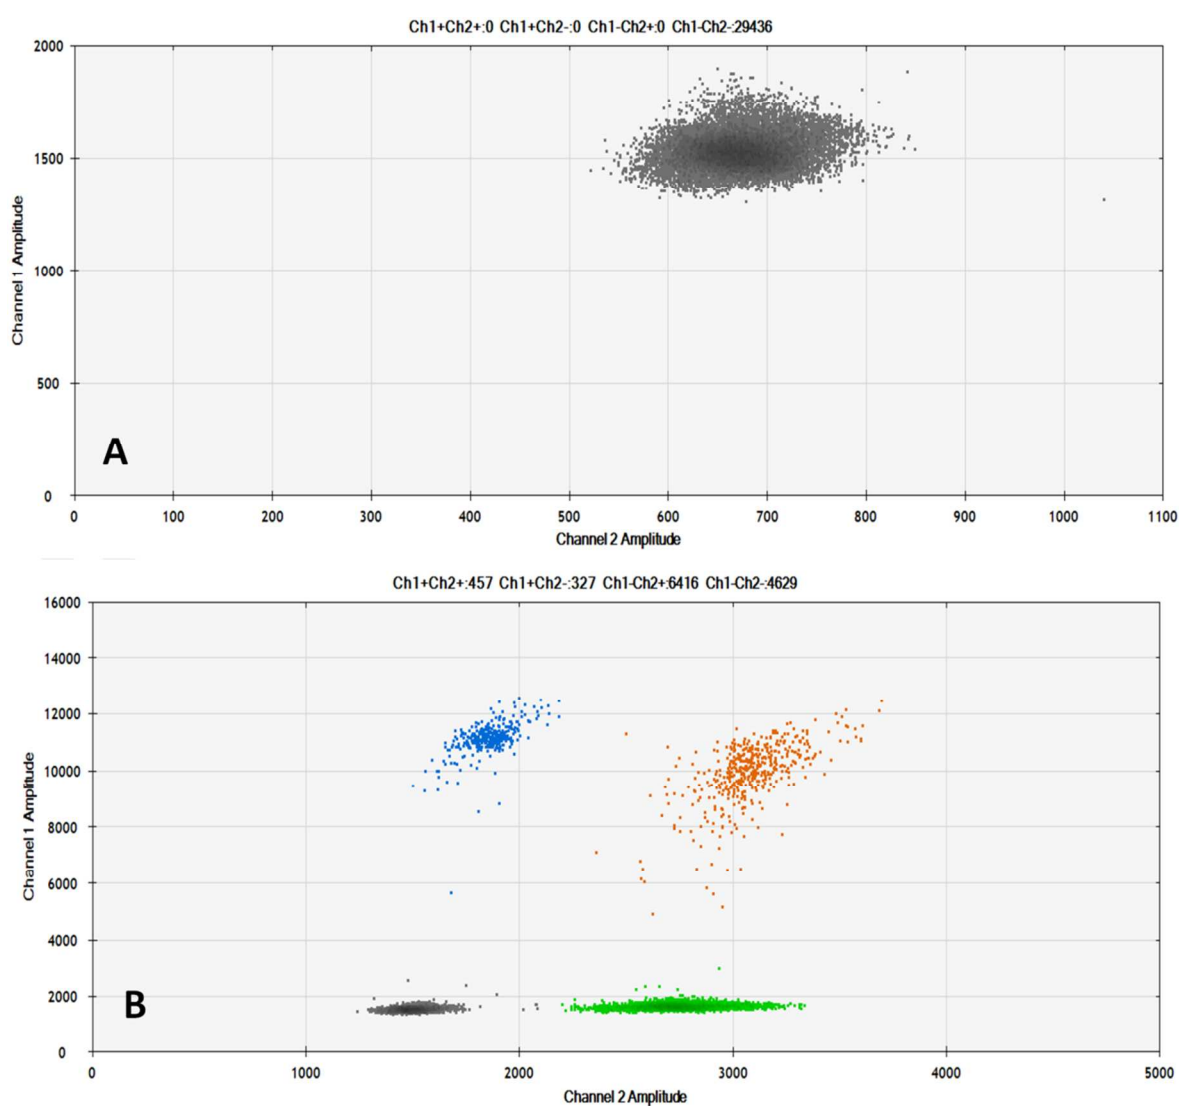

**Figure S1. Example of negative and positive results.** Results from a non-template control (A) and a genetically modified maize sample (B). Each point represents a droplet with a given fluorescence level. Droplet colors indicate which target was amplified: *T-nos* (blue), *hmg* (green), none of the two (gray) or both (orange).

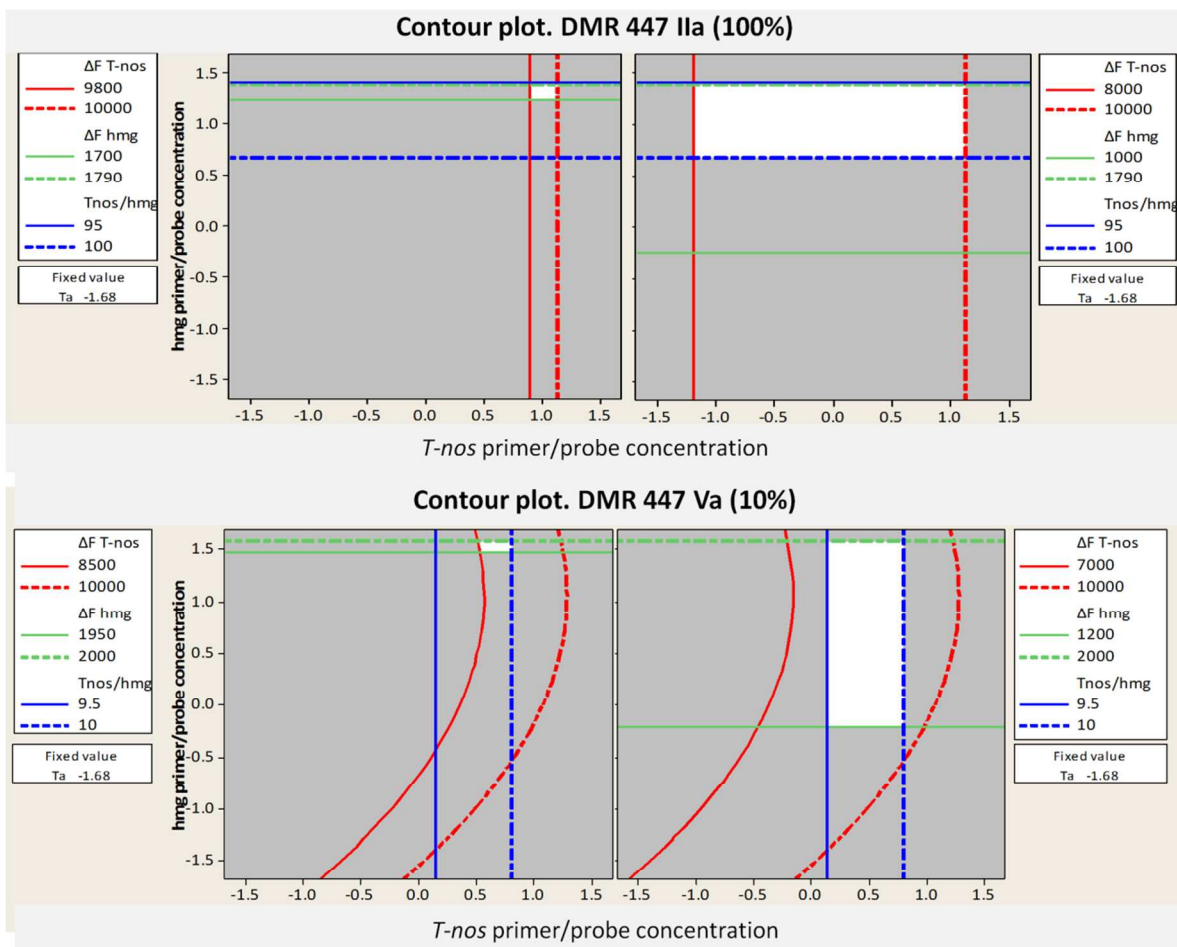

**Figure S2. Overlaid contour plots for ddPCR optimization.** 1) DMR 447 IIa (100%). 2) DMR 447 Va (10%). The white region shows the operating range, where the response variables are predicted to be the ones shown in the lateral boxes.

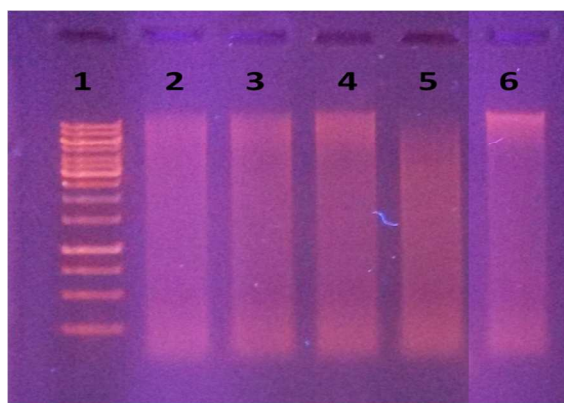

**Figure S3. DNA enzymatic restriction digestion.** 1) DNA ladder; 2) EcoRI; 3) BamHI; 4) XhoI; 5) Multiple digestion; 6) Non-digested DNA.

### **Annex S1. DNA extraction protocol**

The genomic DNA was extracted using the Genomic DNA extraction kit (FAST ID, USA). 500 µL of Genomic Lyse buffer were added to 100mg of maize seed-powder flour, followed by 10 µL of proteinasa K (10 mg/mL). The sample was shaken on termomixer (Bioer, China) for 30 min (16°C; 1,500 rpm) and briefly on vortex at the end. It was centrifuged (labtron scientific, UK) for 12 min (16°C; 12,000 rpm); the supernatant was collected and 400 µL of Genomic Bind buffer were added. The sample was shaken on termomixer (1 min, 20°C, 1,500 rpm) and loaded on a DNA Binding Column. A centrifugal force (5min; 16°C; 10,000 rpm) was applied to pass the sample through the column, and the eluates were discarded. 400µL of Genomic Wash Buffer were added to the column and it was centrifuged again for 5 min (16°C; 10,000 rpm), discarding the eluates. The column was washed three times with 400 µL of 75% ethanol; at the end of every wash the column was centrifuged for 1 min (16°C; 5,000 rpm). The extraction column was transferred to a new vial and it was added with 100 µL of Extraction buffer (1XTE). The samples were incubated for 10 min at 65°C, and later centrifuged for 2 min (16°C; 5,000 rpm). The eluted DNA was collected and stored at -40°C.

### **Annex S2. Workflow for digital droplet PCR analysis**

A mix containing the following reagents was prepared: 10 µL of supermaster mix (Bio-Rad, USA), 1 µL (or the volume needed according to starting and final concentrations desired) of *T-nos* and *hmg* primers and probes, and the volume needed of water for a final volume of 19 µL. This solution was mixed with 1 µL of template DNA. 20 µL of this mix were placed on the sample wells of an 8-well cartridge; the oil wells were filled with 70 µL of droplet generator oil. Droplets were generated using the QX200 droplet generator (Bio-Rad, USA). Water-in-oil emulsions were transferred to a 96-well plate and amplified in a GeneAmp 9500 PCR system (Applied BioSystems, USA). Thermal cycling conditions were: 15 min at 95°C for enzyme activation (1 cycle), followed by 15 s at 94°C for DNA denaturation, and 1 min at the temperature indicated for the experimental design (or the defined optimal temperature: 58°C) for annealing and extension (45 cycles). Products were cooled to 4°C. After amplification, plates were placed on the QX200 droplet reader (Bio-Rad, USA) for data acquisition. FAM signal (*T-nos*) was registered in channel 1, and VIC signal (*hmg*) was measured in channel 2. Only samples with a minimum of 8,000 accepted droplets were considered for subsequent analysis.

### **Annex S3. Enzymatic restriction digestion of genomic DNA**

For restriction digestion assay, a mix was prepared adding the following reagents in the order stated: 12  $\mu$ L of water (molecular biology grade), 2  $\mu$ L of 10X FastDigest buffer (Thermo scientific, USA), 4  $\mu$ L of DNA and 2  $\mu$ L of enzyme (Thermo scientific, USA); it was gently homogenized. The mix was incubated for 5 min (*Bam*HI), 10 min (*Xho*I) or 20 min (*Eco*RI and multiple digestion) in a bath water at 37°C. This solution was used as template DNA for later droplet generation, amplification and analysis by ddPCR.
